# Supplementary material for: Readiness and Perceptions toward Artificial Intelligence among medical students in Egypt
Source: Research Square preprint supplement (doi:10.21203/rs.3.rs-8243793/v1), 2025-12-02
Supplement: Supplementary file 1 [file f1af985dcd62833c43d11489.xlsx]

## Sheet: Sheet1
Statement	Totally Disagree	Disagree	Unsure	Agree	Totally Agree		Statement	Strongly Disagree	Disagree	Neutral	Agree	Strongly Agree
Negatively affects the relationship of the physician with the patient	0.143	0.292	0.281	0.213	0.07		I can define the basic concepts of data science	0.118	0.202	0.354	0.278	0.048
Reduces errors in medical practice	0.062	0.129	0.244	0.43	0.135		I can define the basic concepts of statistics	0.107	0.222	0.315	0.298	0.059
Devalues the medical profession	0.16	0.312	0.267	0.216	0.045		I can explain how AI systems are trained	0.16	0.292	0.323	0.18	0.045
Facilitates patients' access to services	0.062	0.087	0.202	0.466	0.183		I can define the basic concepts and terminology of AI	0.138	0.272	0.298	0.242	0.051
Damages the trust which is the basis of the patient-physician relationship	0.124	0.275	0.27	0.253	0.079		I can properly analyze the data obtained by AI in healthcare	0.152	0.25	0.306	0.228	0.065
Reduces the humanistic aspect of the medical profession	0.112	0.202	0.244	0.326	0.115		I can differentiate the functions and features of AI-related tools and applications	0.124	0.275	0.287	0.244	0.07
Facilitates physicians' access to information	0.07	0.059	0.169	0.449	0.253		I can organize workflows compatible with AI	0.129	0.287	0.281	0.244	0.059
Violations of professional confidentiality may occur more	0.107	0.169	0.317	0.32	0.087		I can express the importance of data collection, analysis, evaluation and safety for the development of AI	0.118	0.225	0.275	0.298	0.084
Enables the physician to make more accurate decisions	0.062	0.124	0.213	0.416	0.185
Increases patients' confidence in medicine	0.079	0.205	0.317	0.298	0.101
Allows the patient to increase their control over their own health	0.062	0.118	0.301	0.399	0.121
Facilitates patient education	0.07	0.073	0.216	0.449	0.191
Statement	Strongly Disagree	Disagree	Neutral	Agree	Strongly Agree		Statement	Strongly Disagree	Disagree	Neutral	Agree	Strongly Agree
I can use AI-based information combined with my professional knowledge	0.118	0.228	0.284	0.25	0.121		I can explain the limitations of AI technology	0.149	0.185	0.326	0.264	0.076
I can use AI technologies effectively and efficiently in healthcare delivery	0.118	0.216	0.315	0.256	0.096		I can explain the strengths and weaknesses of AI technology	0.121	0.169	0.301	0.309	0.101
I can use artificial intelligence applications in accordance with its purpose	0.093	0.16	0.346	0.298	0.104		I can foresee the opportunities and threats that AI technology can create	0.115	0.233	0.306	0.239	0.107
I can access, evaluate, use, share and create new knowledge using information and communication technologies	0.107	0.216	0.295	0.278	0.104
I can explain how AI applications offer a solution to which problem in healthcare	0.121	0.222	0.306	0.278	0.073		Statement	Strongly Disagree	Disagree	Neutral	Agree	Strongly Agree
I find valuable to use AI for education, service and research purposes	0.093	0.149	0.25	0.303	0.205		I can use health data in accordance with legal and ethical norms	0.112	0.18	0.317	0.289	0.101
I can explain the AI applications used in healthcare services to the patient	0.096	0.219	0.362	0.239	0.084		I can conduct under ethical principles while using AI technologies	0.107	0.194	0.292	0.312	0.096
I can choose proper AI application for the problem encountered in healthcare	0.112	0.236	0.34	0.222	0.09		I can follow legal regulations regarding the use of AI technologies in healthcare	0.11	0.149	0.284	0.326	0.132
